# Supplementary material
Source: publisher figshare collection journal article supplement (https://gsapubs.figshare.com/articles/dataset/_/12536228)
Supplement: Supplementary file 1 [file 1]

## Sheet: Kamura section
Dataset DR1: δ238U data with associated geochemical data
Samples	Heights (cm)	Sample weight (g)	δ238U (‰)	2SD	δ13C (‰)	δ18O (‰)	TOC (%)	Mg (ppm)	Al (ppm)	Ca (ppm)	Ti (ppm)	Mn (ppm)	Fe (ppm)	Rb (ppm)	Sr (ppm)	Mo (ppm)	Ba (ppm)	La (ppm)	Ce (ppm)	Pr (ppm)	Nd (ppm)	Sm (ppm)	Eu (ppm)	Gd (ppm)	Tb (ppm)	Dy (ppm)	Ho (ppm)	Er (ppm)	Tm (ppm)	Yb (ppm)	Lu (ppm)	Th (ppm)	U (ppm)
KAMX-1	-30	1.1647	-0.322239	0.0470766	0.22		0.0586732	99052.2	100.94	270055	0.897976	30.433	195.32	0.0621397	183.858	0.157383	3.20399	4.98705	1.89789	0.780622	2.80736	0.541896	0.112062	0.543038	0.074214	0.397084	0.0788644	0.222673	0.0257764	0.150654	0.0197408	0.079228	0.166981
KAMX-2	-20	0.7301	-0.413275	0.0482551	1.31	-4.96	0.0591729	54521.4	58.6133	346195	0.493705	102.302	271.554	0.0403467	161.638	0.254637	2.98536	6.98426	3.32713	1.09099	3.86189	0.653071	0.125624	0.575184	0.0682807	0.314845	0.058109	0.160682	0.0164975	0.0933973	0.0118975	0.109473	0.0937609
KAMX-3	-10	1.0515	-0.592705	0.0459022	0.9	-5.23	0.102053	7135.36	21.3665	397559	0.180822	6.7601	183.362	0.0330833	549.509	0.177478	3.27518	3.73135	1.43771	0.583358	2.10883	0.406673	0.0850029	0.405482	0.0549814	0.285778	0.0553681	0.155201	0.0179169	0.0995455	0.0123997	0.0526025	0.314788
KAMX-4	10	1.2558	-0.64635	0.0374324	0.08	-6.17	0.0679689	3438.82	14.7278	401082	0.150006	4.92587	146.145	0.035521	595.927	0.117717	2.41671	1.69835	0.96654	0.297911	1.07761	0.207782	0.0412805	0.186112	0.0230129	0.111983	0.0204609	0.0566208	0.00593937	0.0353719	0.00456502	0.0393615	0.368079
KAMX-5	20	0.7736					0.0702679	3063.13	19.8942	379953	0.204165	11.6758	357.66	0.0379635	817.063	0.362784	2.44416	1.76101	0.784785	0.276205	1.01706	0.209463	0.0444697	0.196007	0.0261726	0.128	0.0247036	0.0650019	0.00666521	0.0384176	0.00504332	0.0260026	0.430253
KAMX-6	30	0.83	-0.66082	0.0430839	-0.21	-6.11	0.135538	2517.14	50.5181	418118	0.221883	7.28265	287.947	0.0606837	741.084	0.262987	2.5967	2.45842	1.41517	0.434364	1.58496	0.313861	0.0639025	0.296874	0.0396404	0.194886	0.0369771	0.0979066	0.0112773	0.0625967	0.00836001	0.0532891	0.468091
KAMX-7	40	1.3633					0.0737663	100743	98.4666	251022	1.34539	16.0047	278.159	0.0642707	177.009	0.172477	2.78035	3.46053	2.29697	0.640777	2.27889	0.389091	0.0741601	0.32634	0.0375659	0.158121	0.0263857	0.0684224	0.00664054	0.0360192	0.00469326	0.0580818	0.0394331
KAMX-8	50	1.5139	-0.767384	0.0440537	0.02	-7.73	0.13114	2975.23	13.0721	429543	0.151994	5.87428	128.22	0.0338871	1151.52	0.0641576	3.44707	3.11567	1.27035	0.511875	1.83893	0.332927	0.0656619	0.296881	0.0371008	0.169629	0.0311156	0.0854368	0.00879834	0.0470138	0.00600973	0.0368749	0.404317
KAMX-9	70	1.0616					0.0785641	2413.52	18.9293	439089	0.203919	23.0138	79.9596	0.0377629	1342.65	0.0572952	3.45845	2.84288	1.72846	0.537968	1.96142	0.388558	0.0778491	0.365876	0.049346	0.250075	0.0473339	0.127898	0.0140227	0.078655	0.0102221	0.0507546	0.499621
KAMX-10	90	0.9713					0.0949566	2680.94	58.1541	430028	0.405726	79.288	218.568	0.0798082	977.75	0.119275	4.15823	2.43669	1.87333	0.477479	1.71812	0.349853	0.0731025	0.332177	0.044252	0.219798	0.0406139	0.105472	0.0111853	0.0613744	0.00761629	0.0663025	0.438344
KAMX-11	120	1.215	-0.685445	0.0498557	0.3	-9.24	0.103453	1858.71	19.3	428252	0.139293	181.863	159.902	0.0762315	977.745	0.0817109	5.00115	7.39226	4.15288	1.36943	4.94836	0.891493	0.172995	0.839592	0.107525	0.543164	0.103403	0.288847	0.0321241	0.17761	0.023989	0.160418	0.320765
KAMX-12	140	0.7847	-0.676396	0.037374	0.16	-7.43	0.106151	1641.46	19.4767	387909	0.284933	174.432	249.349	0.0346665	1264.86	0.181909	3.57081	6.22436	3.70466	1.07147	3.90627	0.7627	0.149984	0.749909	0.0969549	0.495143	0.0944448	0.251812	0.0274612	0.146572	0.0187772	0.114548	0.363472
KAMX-13	160	0.8784	-0.629718	0.053242	-0.2	-7	0.0943569	1929.67	58.2347	409533	0.290914	82.3648	316.505	0.0610453	1015.46	0.241073	2.87365	3.56766	2.68077	0.689512	2.54453	0.520809	0.10793	0.517826	0.0711252	0.37682	0.0718532	0.193242	0.0218152	0.122636	0.0155121	0.0529084	0.459982
KAMX-14	190	0.8836	-0.495329	0.0452101	1.12	-7.17	0.103553	2532.52	32.6843	402037	0.296603	56.6562	259.56	0.0669946	266.341	0.139011	4.38681	2.96067	2.49166	0.608149	2.23146	0.482299	0.0937896	0.454108	0.0585309	0.285864	0.0517655	0.137824	0.0152352	0.0841386	0.0109789	0.0834903	0.274624
KAMX-15	220	0.9206					0.101154	1808.9	24.7051	398761	0.437496	24.9936	218.418	0.0671382	657.048	0.138595	5.7068	8.12054	7.00529	1.95704	7.10854	1.34601	0.240746	1.00242	0.115308	0.446299	0.0698383	0.184247	0.0170078	0.0949406	0.0117838	0.179771	0.266038
KAMX-16	240	1.0527	-0.464948	0.0594048	1.27	-8.66	0.13044	1758.71	46.0378	418211	0.143412	15.52	146.787	0.0565078	647.758	0.0907991	4.09436	4.78758	3.84928	1.10032	3.97593	0.728532	0.135406	0.558416	0.0631886	0.249541	0.0396499	0.106611	0.00975757	0.0526491	0.00677652	0.0807089	0.280604
KAMX-17	260	0.9525	-0.411553	0.0600987	1.79	-8.1	0.137837	7064	29.9827	387563	0.234195	45.1791	321.38	0.0671159	190.764	0.160873	4.89442	1.62335	1.59188	0.350656	1.29283	0.266399	0.0551464	0.249213	0.032874	0.158598	0.0293672	0.0789974	0.00895219	0.053024	0.00707162	0.0715522	0.192376
KAMX-18	290	0.7653	-0.561086	0.0402362	-0.21	-7.74	0.0847613	1762.26	25.606	389087	0.210628	527.5	414.83	0.0377311	1253.6	0.351229	5.97948	4.76483	5.75758	0.864716	3.12279	0.606254	0.125403	0.596699	0.0758397	0.371069	0.0678537	0.176741	0.0187634	0.102517	0.0129514	0.102129	0.412503
KAMX-19	320	1.3487					0.0847613	36435.6	49.7353	337679	1.80453	48.041	291.339	0.112656	160.662	0.104701	4.80848	2.43961	2.4799	0.523622	1.91643	0.407276	0.0804553	0.372499	0.0479792	0.222291	0.0385329	0.100525	0.0107109	0.0620696	0.00740748	0.0975106	0.0928212
KAMX-20	340	0.9797	-0.411675	0.052283	2.03	-7.81	0.0879598	27078.9	43.7098	372911	0.457933	79.1169	358.754	0.127493	168.998	0.168919	6.30185	3.82033	3.5646	0.835449	3.03414	0.641942	0.122932	0.564238	0.071246	0.326565	0.0553319	0.145557	0.0152101	0.0871435	0.0111779	0.155671	0.195577
KAMX-21	370	1.0359	-0.412621	0.0414669	1.6	-7.74	0.0922578	47801.3	167.843	321727	1.09527	393.233	622.991	0.336234	186.965	0.208328	9.67631	3.18371	3.23647	0.748388	2.61167	0.495525	0.0910587	0.401271	0.0498845	0.230159	0.0396566	0.107204	0.0121539	0.073951	0.00984985	0.299661	0.118598
KAMX-22	400	0.5035	-0.295643	0.0559886	1.69	-8.24	0.0653701	23366.2	96.4835	330394	0.754479	1036.73	702.348	0.368569	151.458	0.254903	14.8214	4.92895	5.8668	1.22718	4.44148	0.876369	0.166875	0.784028	0.100258	0.476584	0.0831422	0.221951	0.0242452	0.137022	0.0182769	0.326031	0.292518
KAMX-23	420	0.952			1.89	-7.82	0.0768649	57442.2	105.873	282973	4.7856	557.307	704.416	0.282677	131.168	0.141037	3.27627	3.39315	3.94422	0.826951	2.9948	0.660295	0.134604	0.635174	0.0914	0.470581	0.0885805	0.24576	0.030495	0.187586	0.0249564	0.290474	0.245774

## Sheet: Standards
Dataset DR2: Analytical results of standard summary
Analytcial results					Results summary
Standards	233U:235U	δ238U (‰)	2SD		Standards	number of measurments	δ238U (‰)	2sd
Blank					CRM129a	6	-1.68383	0.0696464
CRM129a	2.77454	-1.66429	0.0553813		Ricca	6	-0.227301	0.0574284
CRM129a	2.77494	-1.71371	0.055486
CRM129a	2.77825	-1.71193	0.067674		CRM145	44	0.00203469	0.0678813
CRM129a	2.77851	-1.63257	0.0551792
CRM129a	2.76792	-1.66483	0.0368332		Note: CRM129a and Ricca are secondary standard materials,
CRM129a	2.76552	-1.71562	0.0440736		and CRM 145 is the stadard used to correct and to report the final U isotope data
Ricca	2.55368	-0.225247	0.0414428
Ricca	2.55381	-0.203999	0.035203		Concentration test
Ricca	2.55648	-0.219898	0.0551453		Standards	233U:235U	δ238U (‰)	2SD
Ricca	2.55798	-0.209186	0.0840098		CRM145 10ppb	2.48954	0.0716219	0.073623
Ricca	2.54806	-0.283546	0.0343642		CRM145 20ppb	2.48926	-0.00386629	0.0722811
Ricca	2.54553	-0.221928	0.0386062		CRM145 30ppb	2.48894	-0.0742877	0.0692925
					CRM145 40ppb	2.48897	-0.0277214	0.0416914
CRM145	2.48944	-0.0166817	0.0473575		CRM145 60ppb	2.4891	0.0186246	0.0384691
CRM145	2.48929	0.0244749	0.0592663
CRM145	2.48955	0.0178651	0.0495069
CRM145	2.48954	-0.0607763	0.0372134		Spike sample ratio test
CRM145	2.48963	0.0579632	0.0504261		Standards	233U:235U	δ238U (‰)	2SD
CRM145	2.48946	-0.0405471	0.0580361		_145_R1	0.997983	0.0440539	0.0527721
CRM145	2.48956	-0.00849067	0.0394266		_145_R2	1.99072	0.0330773	0.0417999
CRM145	2.48993	0.0310986	0.0373885		_145_R3	2.9802	0.0533053	0.0456223
CRM145	2.48987	0.0067404	0.0634591		_145_R4	3.97354	0.0951156	0.0514154
CRM145	2.48985	-0.00596904	0.0481219		_145_R5	4.97736	0.0088016	0.0505099
CRM145	2.48974	-0.00747235	0.0391		Description: We have tested sample-spike ratio from 1:5
CRM145	2.49108	-0.0106857	0.0491789
CRM145	2.48908	0.0319661	0.0461507		In-house coral standard
CRM145	2.49435	-0.032985	0.0613563		Samples	sample weights (g)	number of measurements	233U:235U	δ238U (‰)	2SD
CRM145	2.49741	0.0242376	0.0886546		Coral-1	1.5	3	1.63306	-0.417543	0.0428094
CRM145	2.49707	-0.0224648	0.0966622		Coral-2	0.5	3	1.91625	-0.3926	0.0900649
CRM145	2.49852	0.0317453	0.0827979
CRM145	2.49626	-0.020291	0.0693043
CRM145	2.50025	-0.0438554	0.114594
CRM145	2.5	0.0199874	0.0749841
CRM145	2.4901	0.0685204	0.0471741
CRM145	2.49373	0.00233975	0.0721891
CRM145	2.49206	0.0281622	0.0531722
CRM145	2.49204	-0.019337	0.0592876
CRM145	2.49487	-0.00924144	0.0709616
CRM145	2.49254	0.021833	0.0545184
CRM145	2.49244	0.0425947	0.0488981
CRM145	2.48434	0.00887154	0.039246
CRM145	2.48514	-0.0416516	0.0483177
CRM145	2.48335	0.0373371	0.0606323
CRM145	2.48471	-0.0349504	0.049227
CRM145	2.48339	0.00205411	0.0517172
CRM145	2.48412	0.0487923	0.0391261
CRM145	2.48211	-0.0790141	0.0306944
CRM145	2.48215	0.0821204	0.0404297
CRM145	2.48183	-0.0425483	0.0401197
CRM145	2.48175	0.0134	0.0516276
CRM145	2.48172	-0.0305322	0.0521342
CRM145	2.48165	0.0102489	0.0414285
CRM145	2.48174	0.0139258	0.0468464
CRM145	2.48194	2.48249e-05	0.0399544
CRM145	2.4818	0.0060787	0.0482106
CRM145	2.48113	0.00146142	0.0483362
CRM145	2.48097	-0.0168233	0.0342553
KAMX-1	1.89108	-0.322239	0.0470766
KAMX-2	1.97004	-0.413275	0.0482551
KAMX-3	1.68486	-0.592705	0.0459022
KAMX-4	1.91956	-0.64635	0.0374324
KAMX-6	1.74792	-0.66082	0.0430839
KAMX-8	1.74878	-0.767384	0.0440537
KAMX-11	1.79743	-0.685445	0.0498557
KAMX-12	1.77803	-0.676396	0.037374
KAMX-13	1.8286	-0.629718	0.053242
KAMX-14	2.00016	-0.495329	0.0452101
KAMX-16	1.54279	-0.464948	0.0594048
KAMX-17	1.89172	-0.411553	0.0600987
KAMX-18	1.7369	-0.561086	0.0402362
KAMX-20	1.73394	-0.411675	0.052283
KAMX-21	1.93166	-0.412621	0.0414669
KAMX-22	1.8751	-0.295643	0.0559886

## Sheet: Data Compilation
Dataset DR3: Combined δ238U and δ13C data
Sample	Height (m)	Estimated Age (Ma)	δ13C (‰)	δ18OPDB (‰)	δ238U (‰)	δ238U (2sd)	U/Al	Mg/Ca	Mn/Sr
Kamura, this study
'KAMX-1'	-0.3	251.958	0.22		-0.322239	0.07	16.5427	0.61131	0.165525
'KAMX-2'	-0.2	251.946	1.31	-4.96	-0.413275	0.07	15.9965	0.262479	0.632909
'KAMX-3'	-0.1	251.94	0.9	-5.23	-0.592705	0.07	147.328	0.0299132	0.0123021
'KAMX-4'	0.1	251.922	0.08	-6.17	-0.64635	0.07	249.922	0.0142898	0.00826589
'KAMX-6'	0.3	251.897	-0.21	-6.11	-0.759818	0.07	92.6581	0.0100336	0.00982701
'KAMX-8'	0.5	251.881	0.02	-7.73	-0.767384	0.07	309.298	0.0115442	0.00510132
'KAMX-11'	1.2	251.823	0.3	-9.24	-0.685445	0.07	166.2	0.00723368	0.186002
'KAMX-12'	1.4	251.806	0.16	-7.43	-0.676396	0.07	186.619	0.00705261	0.137907
'KAMX-13'	1.6	251.79	-0.2	-7	-0.629718	0.07	78.9876	0.00785311	0.0811105
'KAMX-14'	1.9	251.765	1.12	-7.17	-0.495329	0.07	84.0233	0.0104987	0.212721
'KAMX-16'	2.4	251.723	1.27	-8.66	-0.464948	0.07	60.9508	0.00700888	0.0239595
'KAMX-17'	2.6	251.707	1.79	-8.1	-0.411553	0.07	64.1626	0.0303779	0.236833
'KAMX-18'	2.9	251.682	-0.21	-7.74	-0.561086	0.07	161.096	0.0075487	0.420788
KAMX-19'	3.2	251.657	2.03		-0.521249	0.07	18.6631	0.179833	0.299019
'KAMX-20'	3.4	251.641	1.6	-7.81	-0.411675	0.07	44.7445	0.121025	0.468152
'KAMX-21'	3.7	251.616	1.69	-7.74	-0.412621	0.07	7.06599	0.247628	2.10325
'KAMX-22'	4	251.591	1.89	-8.24	-0.295643	0.07	30.3179	0.11787	6.84499
Dawen, Brennecka et al. 2011
1000	10	251.841	-0.17		-0.63	0.08	0.76
880	8.8	251.853	-0.83		-0.64	0.08	1.15
802.5	8.025	251.861	-0.21		-0.59	0.08	1.75
727.5	7.275	251.868	-0.26		-0.47	0.08	1.03
672.5	6.725	251.874	-1.07		-0.7	0.08	3.15
610	6.1	251.88	-0.29		-0.63	0.08	1.19
585	5.85	251.883	-0.09		-0.77	0.08	1.8
522.5	5.225	251.889	-0.2		-0.49	0.08	2.28
500	5	251.891	-1.23		-0.72	0.08	2.26
435	4.35	251.897	-0.34		-0.79	0.08	2.98
421.5	4.215	251.899			-0.7	0.08	1.35
395	3.95	251.901	-0.28		-0.62	0.08	1.51
362.5	3.625	251.905	-0.05		-0.62	0.08	1.09
310	3.1	251.91	-0.1		-0.71	0.08	1.63
292.5	2.925	251.912	-0.04		-0.75	0.08	0.23
131.5	1.315	251.928	1.02		-0.57	0.08	1.28
124.5	1.245	251.928	0.3		-0.58	0.08	0.34
92	0.92	251.931	0.27		-0.68	0.08	0.68
76	0.76	251.933	0.66		-0.66	0.08	1.25
51	0.51	251.936	-0.37		-0.64	0.08	1.2
33	0.33	251.937	1.38		-0.73	0.08	0.87
23	0.23	251.938	0.88		-0.64	0.08	0.95
15	0.15	251.939	1.67		-0.78	0.08	2.56
10.5	0.105	251.94	1.82		-0.48	0.08	0.88
8.2	0.082	251.94	0.73		-0.77	0.08	0.34
2.5	0.025	251.94	0.05		-0.46	0.08	0.53
-4	-0.04	251.941	0.56		-0.64	0.08	5.3
-40	-0.4	251.945	1.72		0.15	0.08	19.52
-64.5	-0.645	251.947	0.52		-0.24	0.08	14.58
-97.5	-0.975	251.95	1.92		-0.58	0.08	16.67
-117.5	-1.175	251.952	1.82		-0.76	0.08	4.84
-160	-1.6	251.956	2.36		-0.36	0.08	12.87
-270	-2.7	251.967	2.8		-0.48	0.08	0.96
-330	-3.3	251.973	1.15		-0.04	0.08	3.84
-370	-3.7	251.977	1.28		-0.45	0.08	9.92
-389.5	-3.895	251.979	2.57		-0.39	0.08	38.75
-409.5	-4.095	251.981	2.95		-0.3	0.08	2.23
Taşkent, Lau et al., 2016
TCX-0	0	252.37	5.113	-5.084	-0.189	0.082	6	0.02	0.08
TCX-6	6	252.317	4.778	-6.855	-0.061	0.153	3	0.01	0.08
TCX-10	10	252.281	4.829	-6.111	-0.029	0.111	2.1	0.01	0.19
TCX-16	16	252.228	4.04	-6.059			4.1	0.01	0.08
TCX-21	21	252.183	4.49	-6.114	-0.105	0.231	10.5	0.01	0.05
TCX-25	25	252.148	4.617	-4.579	-0.265	0.087	6.4	0.02	0.1
TCX-29	29	252.112	4.337	-5.599	-0.199	0.196	10.9	0.01	0.05
TCX-35	35	252.058	3.774	-5.758	-0.359	0.15	5.9	0.01	0.1
TCX-40	40	252.014	4.087	-5.303	-0.226	0.087	3.9	0.01	0.07
TCX-44	44	251.978	2.25	-6.462	0.05	0.173	6.8	0.01	0.15
TCX-47	47	251.943	3.613	-5.989	-0.104	0.109	5.5	0.01	0.18
TK-1.5	48.3	251.94	2.389	-6.203	-0.156	0.095	4.1	0.01	0.19
TK-3.8	50.6	251.934	-0.03	-6.714	-0.551	0.17	0.5	0.01	0.14
TK-18.1	64.9	251.897	-0.893	-7.089	-0.778	0.023	2.2	0	0.02
TK-48.5	95.3	251.82	-0.586	-7.322			1.1	0	0.03
TK-72	118.8	251.417	1.02	-7.542	-0.726	0.056	6	0	0.02
TK-88	134.8	251.718	0.494	-7.435	-0.587	0.108	0.1	0	0.16
TK-109	155.8	251.951	1.778	-6.651	-0.506	0.107	0.8	0.08	0.13
Dajiang, Lau et al., 2016
PDJ 10	20	252.092	3.314	-3.775	-0.263	0.078	31.8	0.03	0.25
PDJ 17	26.4	252.062	3.225	-4.778	-0.18	0.082	15.5	0.01	0.23
PDJ 26	35.6	252.019	3.018	-4.047	-0.014	0.166	12.8	0.01	0.25
PDJ 33A	43	251.984	2.875	-3.44	-0.071	0.04	8.7	0.11	0.62
PDJ 40	49.7	251.953	2.221	-5.305	0.14	0.108	305	0.02	0.17
PDJ 44A	52.5	251.94	0.949	-4.009	-0.701	0.187	12.9	0.08	0.77
PDJ 49	56.7	251.92	1.242	-3.441			0.7	0.16	0.83
PDJ 50	57.3	251.918	0.367	-4.481			23.7	0.07	0.88
PDJ 52	59.2	251.909	0.388	-2.995			2.6	0.02	0.46
PDJ 55	61.6	251.897	-0.03	-6.003	-0.564	0.092	11.1	0.02	0.63
PDJ 68	70.4	251.735	1.866	-5.317			4.6	0.01	0.11
PDJ 72	73.9	251.708	1.697	-4.404			1.2	0.03	0.22
PDJ 75	76	251.691	2.306	-4.465	-0.538	0.095	7.9	0.01	0
PDJ 90	88.5	251.594	2.287	-4.401			1.2	0	-0.01
PDJ 97	95.2	251.542	2.161	-2.412	-0.562	0.15	1.4	0.01	-0.03
PDJ 100	97.6	251.523	2.428	-2.818			10.2	0.02	0.03
PDJ 107	103.8	251.475	2.396	-3.436			2.8	0.03	0.02
PDJ 112	107.9	251.443	2.139	-4.424	-0.612	0.104	3.5	0.04	0
PDJ 115	110.4	251.423	1.963	-6.079			7.8	0.05	0.03
PDJ 118	113	251.403	1.801	-4.661	-0.547	0.185	2.6	0.03	-0.04
PDJ 162	217.5	250.589	1.105	-4.887	-0.443	0.038	0.7	0.02	0.09
PDJ 171	228.8	250.501	1.005	-4.886	-0.555	0.049	6.7	0.01	0.03
